# Supplementary material
Source: PubMed Central journal article supplement (PMC8332866)
Supplement: ajcr0011-3496-f10.pdf [file ajcr0011-3496-f10.pdf]

## Epimedokoreanin C induces methuosis in lung cancer cells

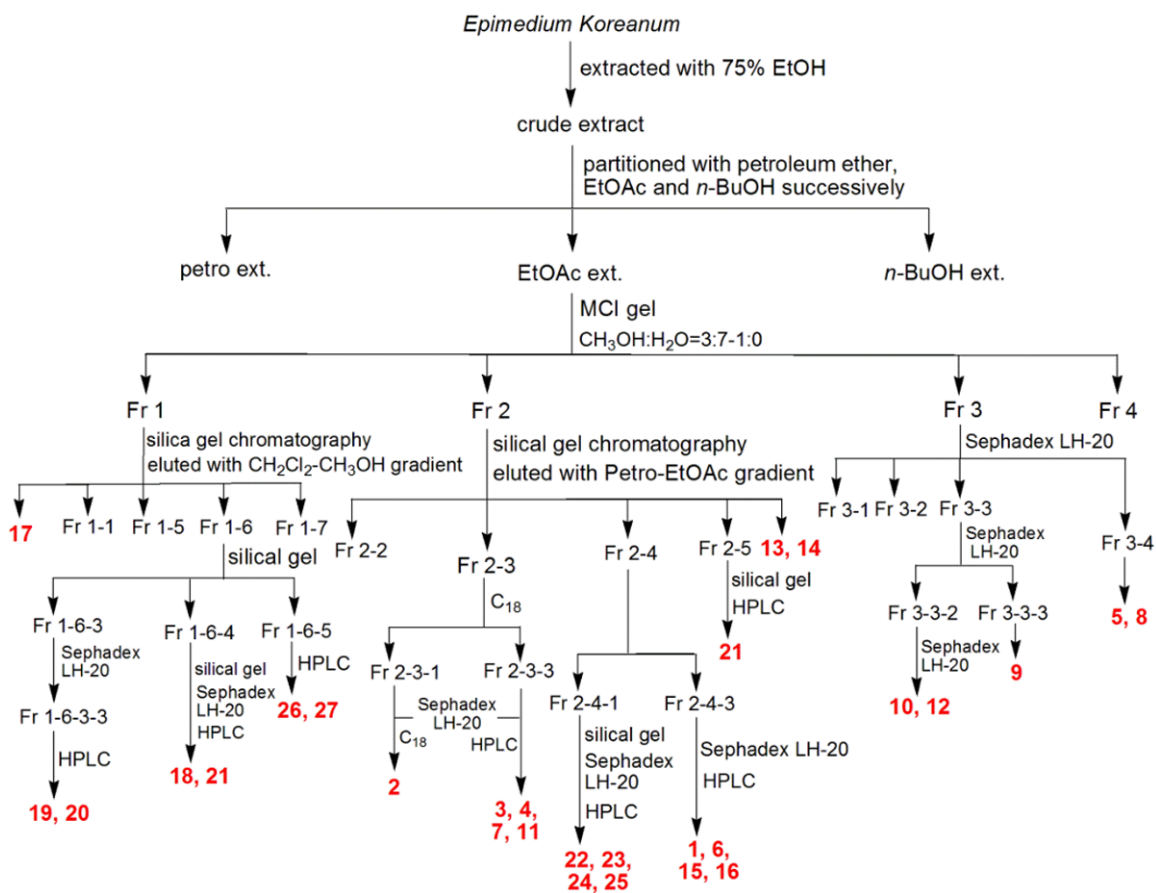

**Figure S1.** A schematic procedure for the isolation of 27 prenylated flavonoids from *E. koreanum*.

**Table S1.** Prenylated flavonoids from *E. koreanum* and their  $IC_{50}$  values

| No | Name                    | Structure                                                                            | $IC_{50}$ ( $\mu$ M) |
|----|-------------------------|--------------------------------------------------------------------------------------|----------------------|
| 1  | Epimedokoreanin C (EKC) | 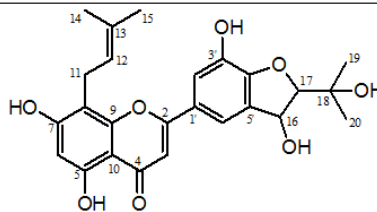 | 17.04                |
| 2  | Epicornuin A            |  | > 50                 |
| 3  | Epicornuin B            |  | 44.80                |

## Epimedokoreanin C induces methuosis in lung cancer cells

|    |                                                      |                                                                                      |       |
|----|------------------------------------------------------|--------------------------------------------------------------------------------------|-------|
| 4  | Epicornuin F                                         | 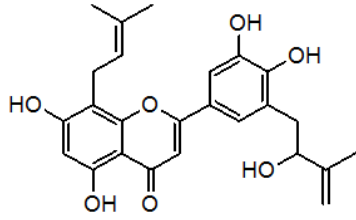   | > 50  |
| 5  | Epimedokoreanin B                                    |    | 13.69 |
| 6  | Koreanoside F                                        |    | > 50  |
| 7  | Epimedokoreanin D                                    |   | 23.53 |
| 8  | Icaritin                                             |  | 33.96 |
| 9  | $\beta$ -anhydroicaritin                             |  | 10.08 |
| 10 | Epimedonin C                                         |  | > 50  |
| 11 | 5,7-dihydroxy-2-(p-hydroxyphenoxy)-6-prenyl chromone |  | 25.03 |

# Epimedokoreanin C induces methuosis in lung cancer cells

|    |                         |                                                                                      |       |
|----|-------------------------|--------------------------------------------------------------------------------------|-------|
| 12 | Epimedonin B            | 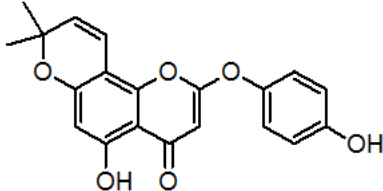   | 15.90 |
| 13 | Icariside I             |    | 40.11 |
| 14 | Baohuoside I            |    | 17.17 |
| 15 | Koreanoside D           |   | > 50  |
| 16 | Koreanoside E           |  | > 50  |
| 17 | Icarrin                 |  | > 50  |
| 18 | Epimedoside C           |  | > 50  |
| 19 | Icaritin-3-O-rhamnoside |  | > 50  |

## Epimedokoreanin C induces methuosis in lung cancer cells

|    |                      |                                                                                      |       |
|----|----------------------|--------------------------------------------------------------------------------------|-------|
| 20 | Caohuoside C         | 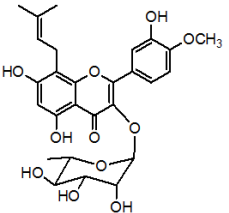   | > 50  |
| 21 | Ikarisoside A        |    | 35.32 |
| 22 | Korepimeoside A      |    | 35.15 |
| 23 | Korepimeoside B      |   | 26.55 |
| 24 | Korepimedoside A     |  | 30.65 |
| 25 | Sagittatoside C      |  | > 50  |
| 26 | Epimedokoreanoside   |  | > 50  |
| 27 | Epimedokoreanoside I |  | > 50  |
